# Supplementary material
Source: PubMed Central journal article supplement (PMC8852822)
Supplement: NIHMS1768749-supplement-Supplementary_information.pdf [file NIHMS1768749-supplement-Supplementary_information.pdf]

**Supplementary Table 1.** Differentially methylated regions between rhesus macaques exposed to wildfire smoke in early life and rhesus macaques with no early life exposure to wildfire smoke.

Note: betaCoefficient is presented with respect to exposed macaques (*i.e.* a positive betaCoefficient implies hypermethylation in exposed macaques compared to control macaques)

**Supplementary Table 2.** Canonical pathways from Ingenuity Pathway Analysis that were enriched in all differentially methylated regions.

**Supplementary Table 3.** Canonical pathways from Ingenuity Pathway Analysis that were enriched in differentially methylated regions hypermethylated in macaques exposed to wildfire smoke in early life.

**Supplementary Table 4.** Canonical pathways from Ingenuity Pathway Analysis that were enriched in differentially methylated regions hypomethylated in macaques exposed to wildfire smoke in early life.

**Supplementary Table 5.** Transcription factor binding site motifs that were significantly enriched in differentially methylated regions (from HOMER (1)).

**Supplementary Table 6.** The differentially expressed gene between rhesus macaques exposed to wildfire smoke in early life and rhesus macaques with no early life exposure to wildfire smoke.

Note: log2FoldChange is presented with respect to exposed macaques (*i.e.* a positive

log2FoldChange implies greater expression in exposed macaques compared to control macaques).

**Supplementary Table 7.** Genes in the purple module (the module most significantly associated with exposure) from the weighted gene coexpression network analysis (WGCNA (2)).

**Supplementary Table 8.** Canonical pathways from Ingenuity Pathway Analysis that were enriched in genes in the purple module from the WGCNA (2) analysis.

**Supplementary Table 9.** Genes that showed significant correlation ( $p \leq 0.05$ ) between methylation and expression across all samples.

**Supplementary Table 10.** Canonical pathways from Ingenuity Pathway Analysis that were enriched in genes that had significantly correlated methylation and expression.

**Supplementary Table 11.** Comparison between differentially methylated genes from the current study and other studies on respiratory diseases.

**Supplementary Table 12.** Extended information on the samples in our current study.

**Supplementary Figure 1.** Enrichment of different CpG features associated with all differentially methylated regions, regions hypermethylated in wildfire-exposed macaques, and regions

hypomethylated in wildfire-exposed macaques. Asterisks indicate a significant deficit or enrichment of the feature in a given set ( $p \leq 0.05$ ).

**Supplementary Figure 2.** Enrichment of different genic features associated with all differentially methylated regions, regions hypermethylated in wildfire-exposed macaques, and regions hypomethylated in wildfire-exposed macaques. Asterisks indicate a significant deficit or enrichment of the feature in a given set ( $p \leq 0.05$ ).

**Supplementary Figure 3.** Heatmaps showing sample clustering by A) methylation and B) gene expression, and principal component analysis showing sample clustering by C) methylation and D) gene expression.

**Supplementary Figure 4.** Module-trait relationship between clusters identified in WGCNA and either exposure or animal weight. The top number in each box is the correlation value (ranging from -1 to 1), while the bottom number in parentheses is the p-value for this correlation.

**Supplementary Figure 5.** Top enriched biological process, cellular component, and molecular function gene ontology terms identified by GOfuncR (3) associated with differentially methylated regions between wildfire-exposed macaques and control macaques.

**Supplementary Figure 6.** Heatmap showing all samples clustering by gene expression. Gene expression data from the two leftmost samples were removed from the study as outliers.

## References

1. Heinz S, Benner C, Spann N, Bertolino E, Lin YC, Laslo P, et al. Simple combinations of lineage-determining transcription factors prime cis-regulatory elements required for macrophage and B cell identities. *Mol Cell*. 2010;38(4):576-89.
2. Langfelder P, Horvath S. WGCNA: an R package for weighted correlation network analysis. *BMC Bioinformatics*. 2008;9(1):559.
3. Grote S. GOfuncR: Gene ontology enrichment using FUNC. R package version 1.10.0 ed2020.
