# Supplementary material
Source: PubMed Central journal article supplement (PMC8852822)

# Clustering by gene expression

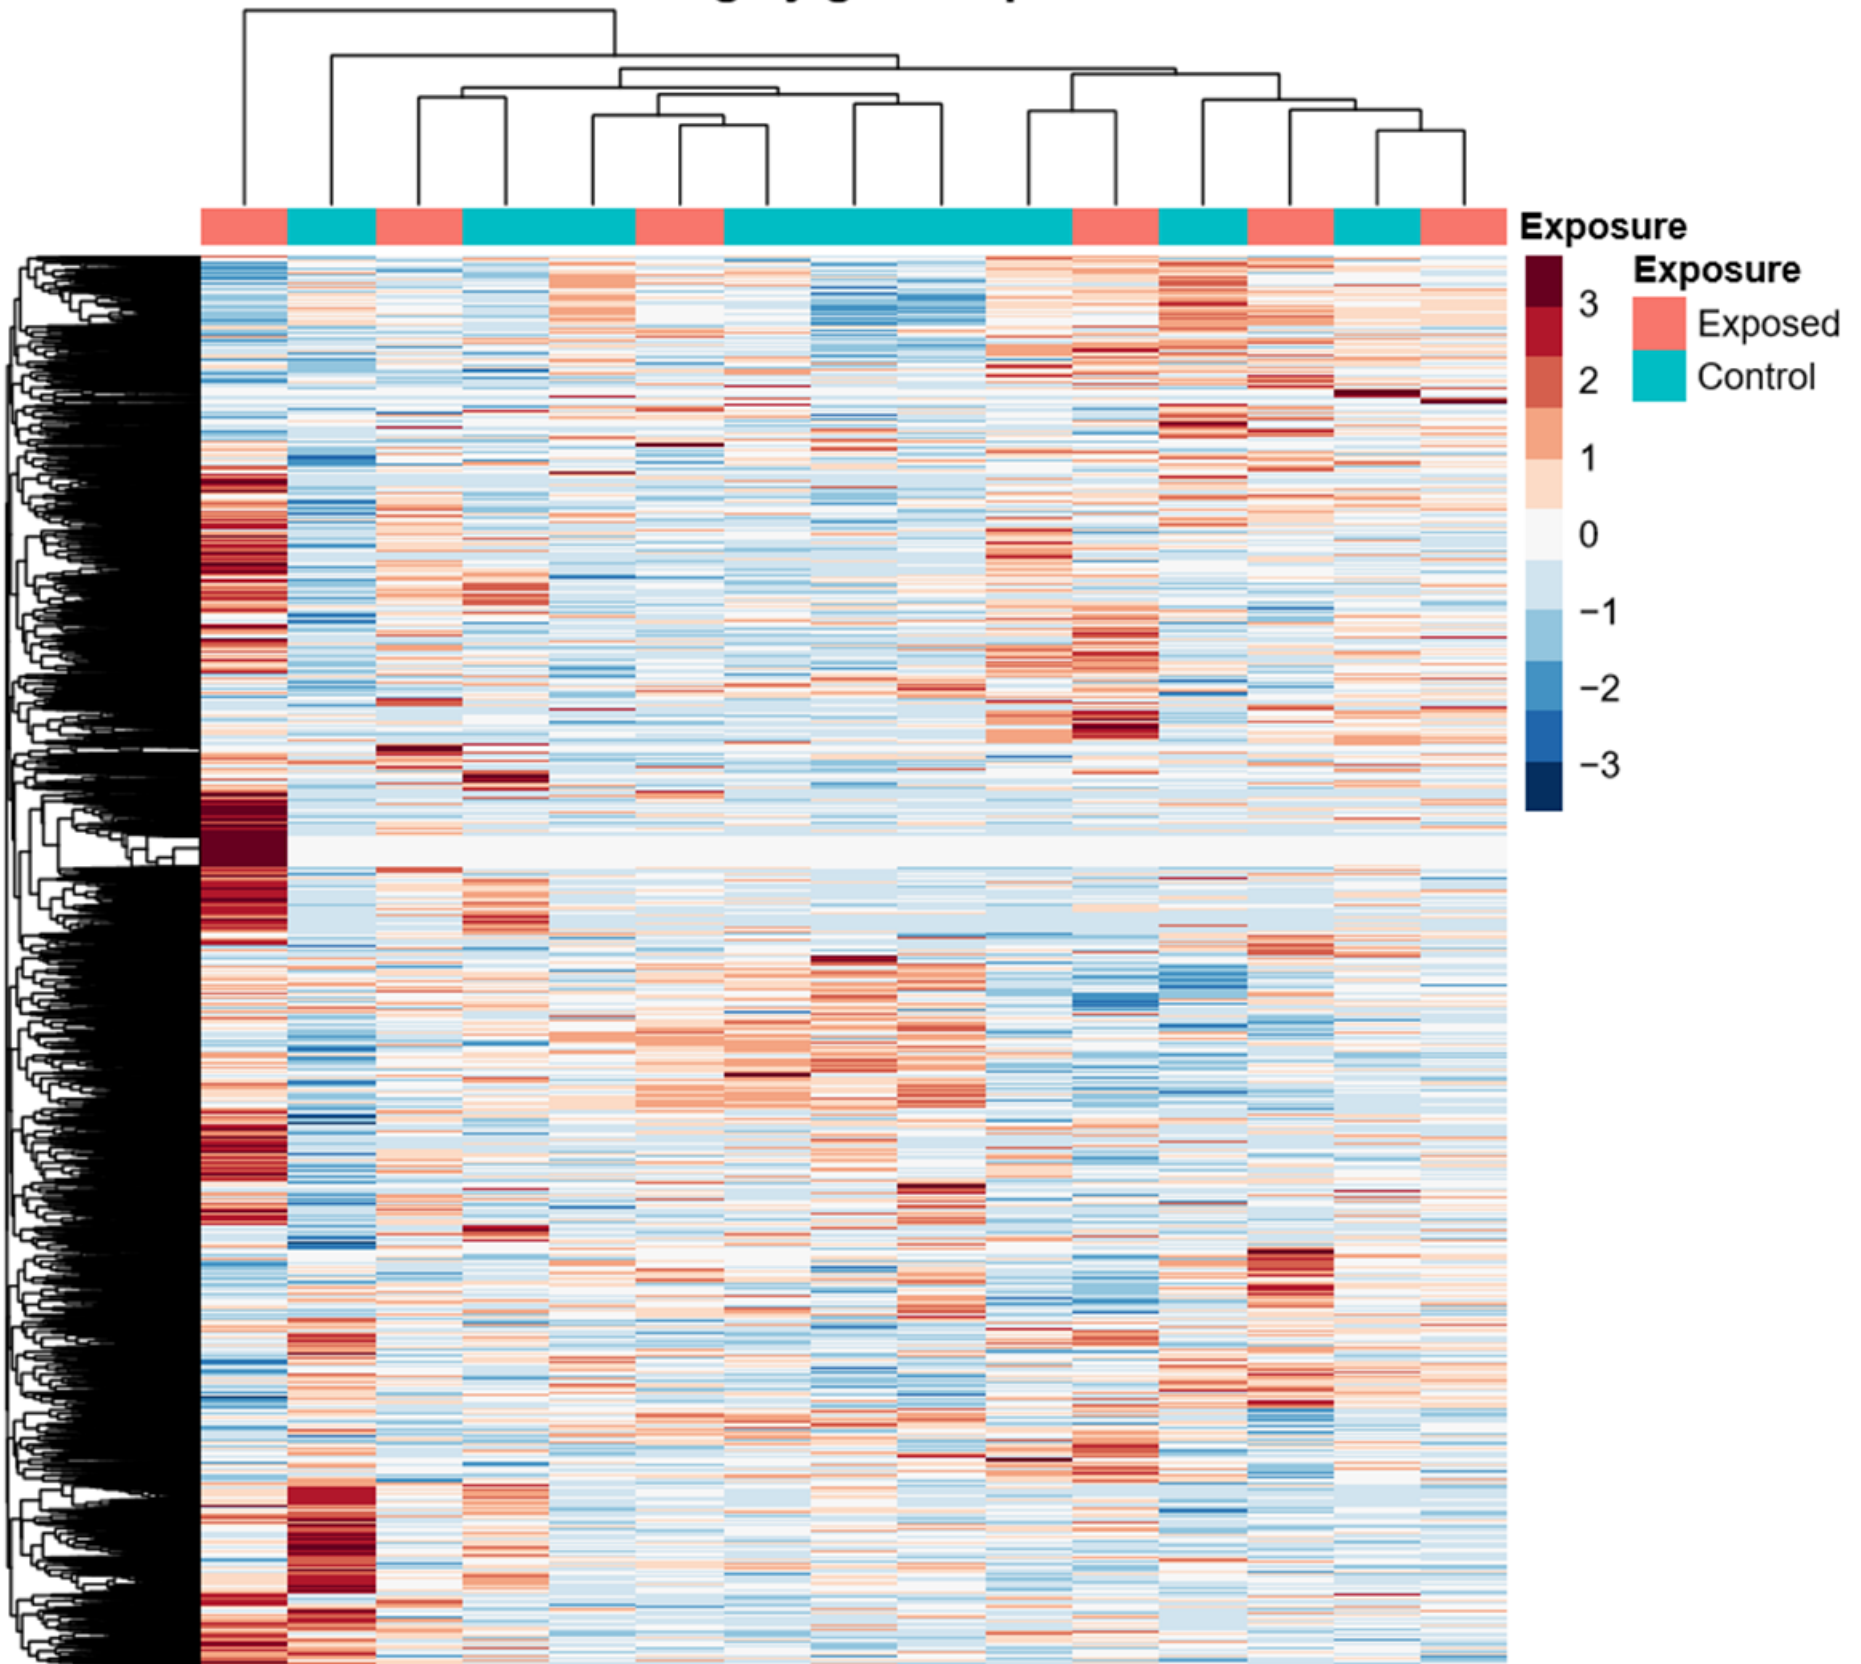

Supplemntary Figure 1

Supplement: NIHMS1768749-supplement-SupplementaryFigure1.pdf [file NIHMS1768749-supplement-SupplementaryFigure1.pdf]

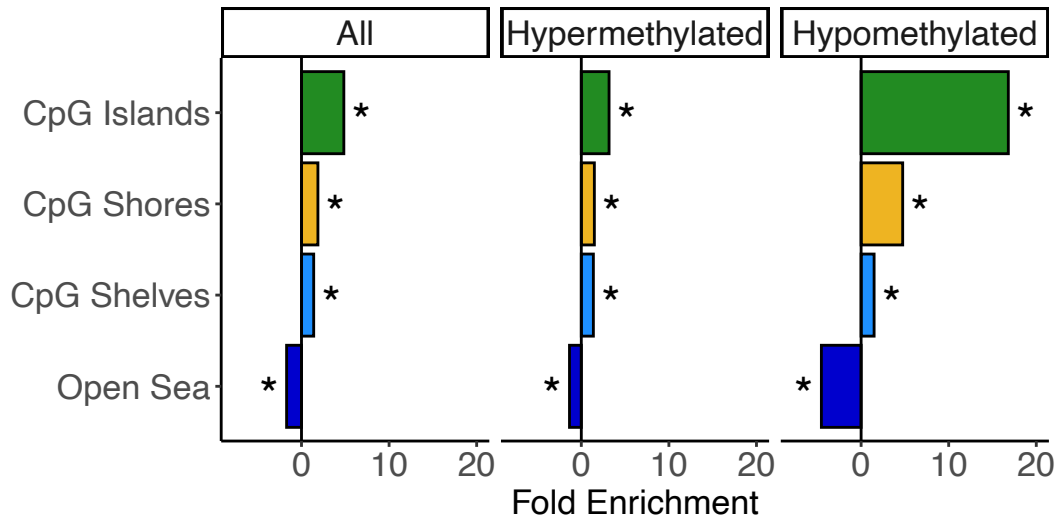

Supplementry Figure 2

Supplement: NIHMS1768749-supplement-SupplementaryFigure2.pdf [file NIHMS1768749-supplement-SupplementaryFigure2.pdf]

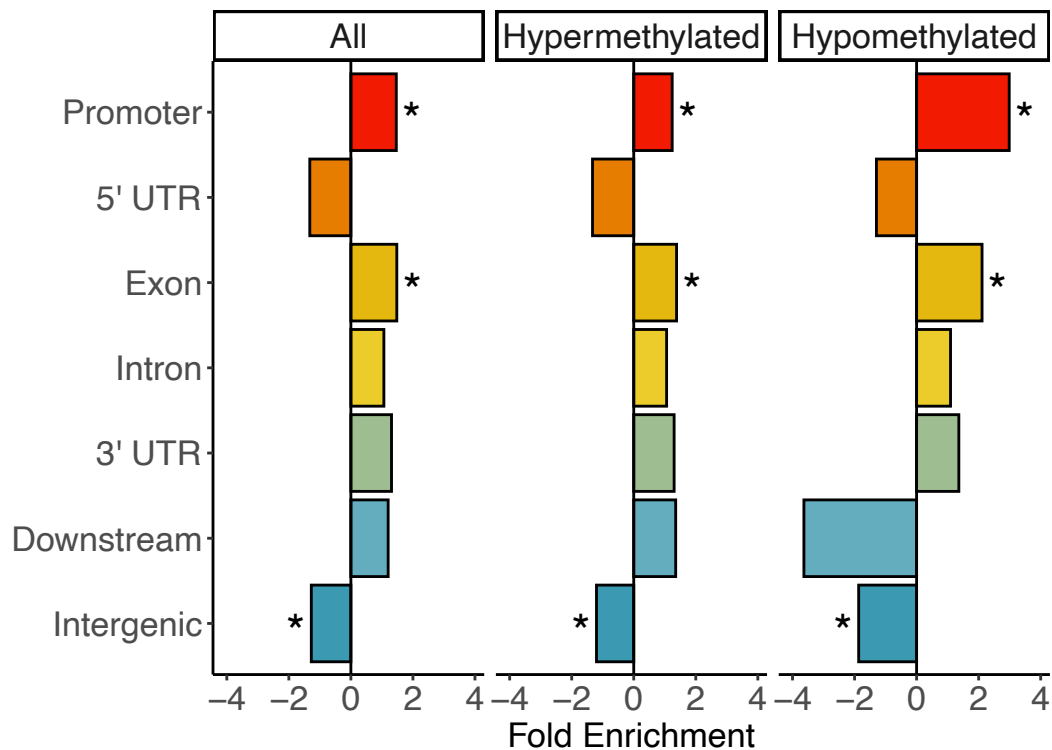

Supplemntary Figure 3

Supplement: NIHMS1768749-supplement-SupplementaryFigure3.pdf [file NIHMS1768749-supplement-SupplementaryFigure3.pdf]

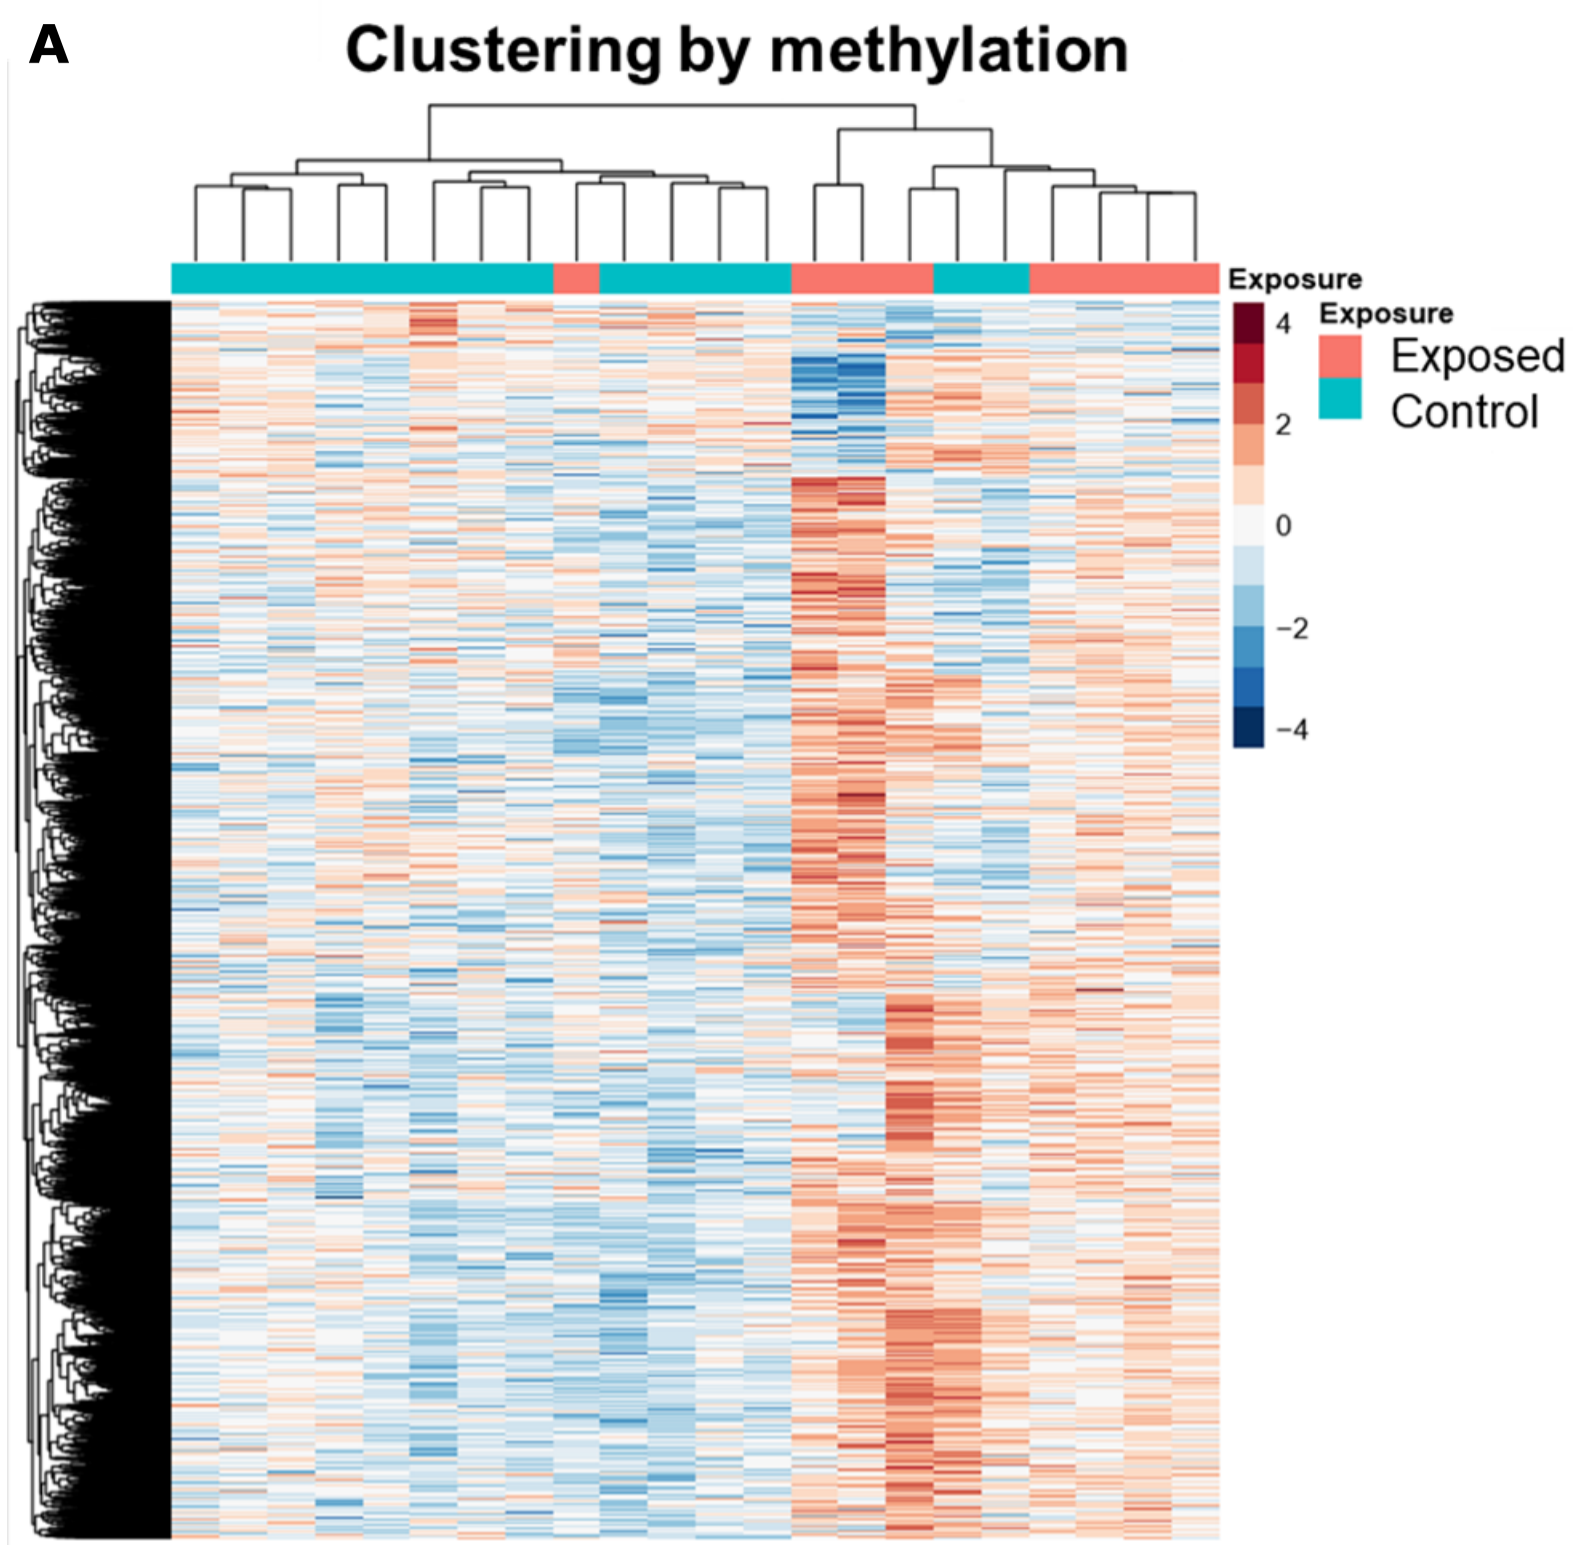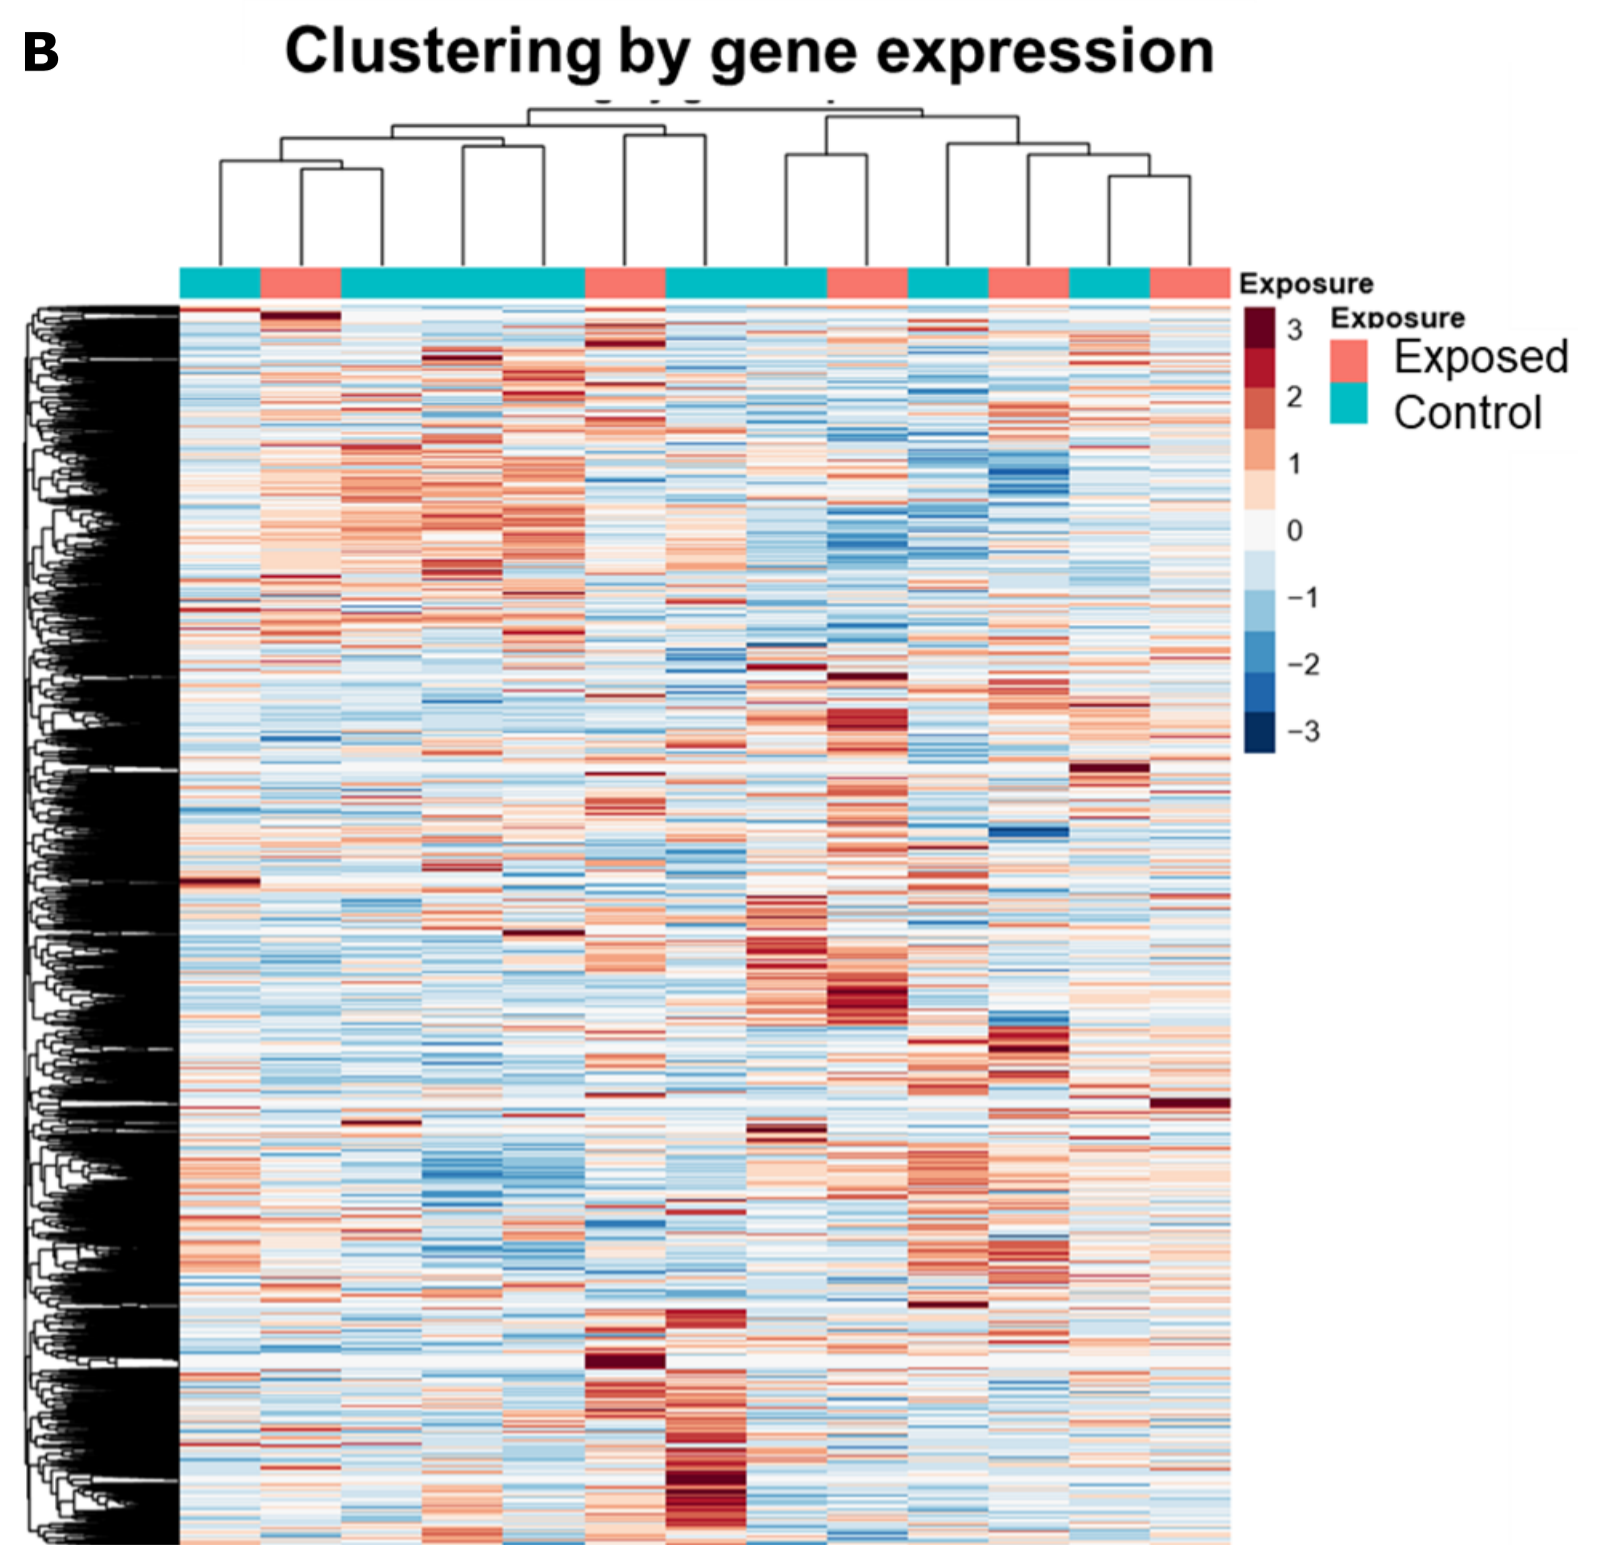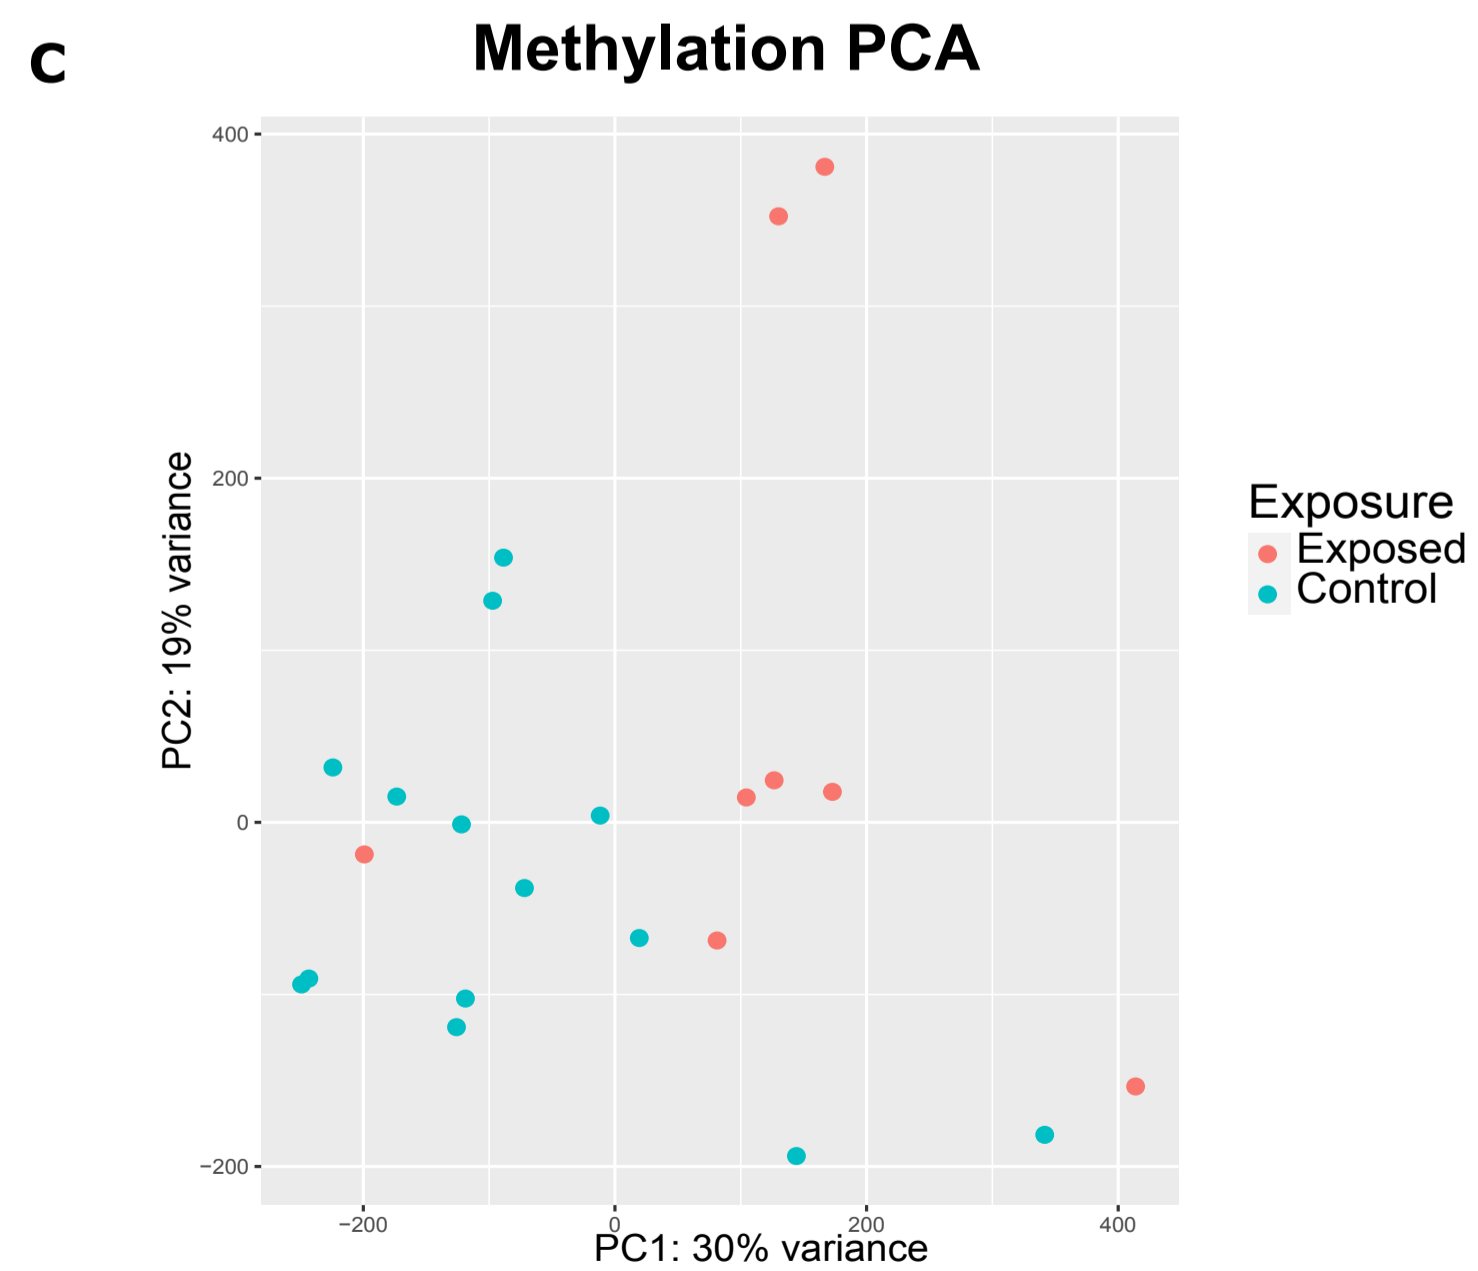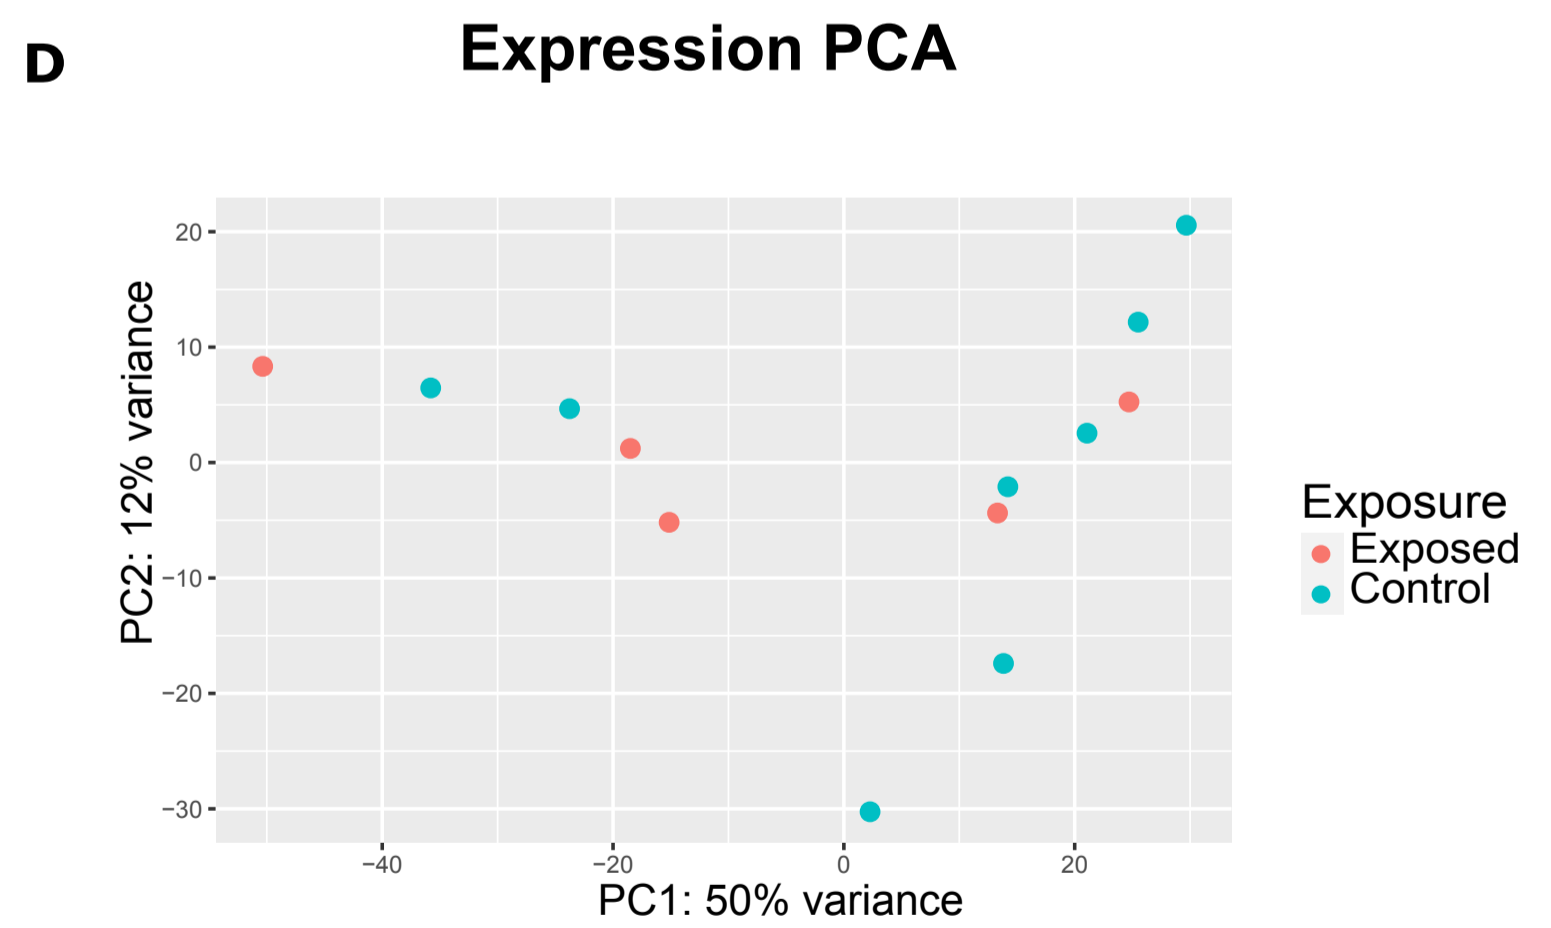

Supplementry Figure 4

Supplement: NIHMS1768749-supplement-SupplementaryFigure4.pdf [file NIHMS1768749-supplement-SupplementaryFigure4.pdf]

## Module-trait relationships

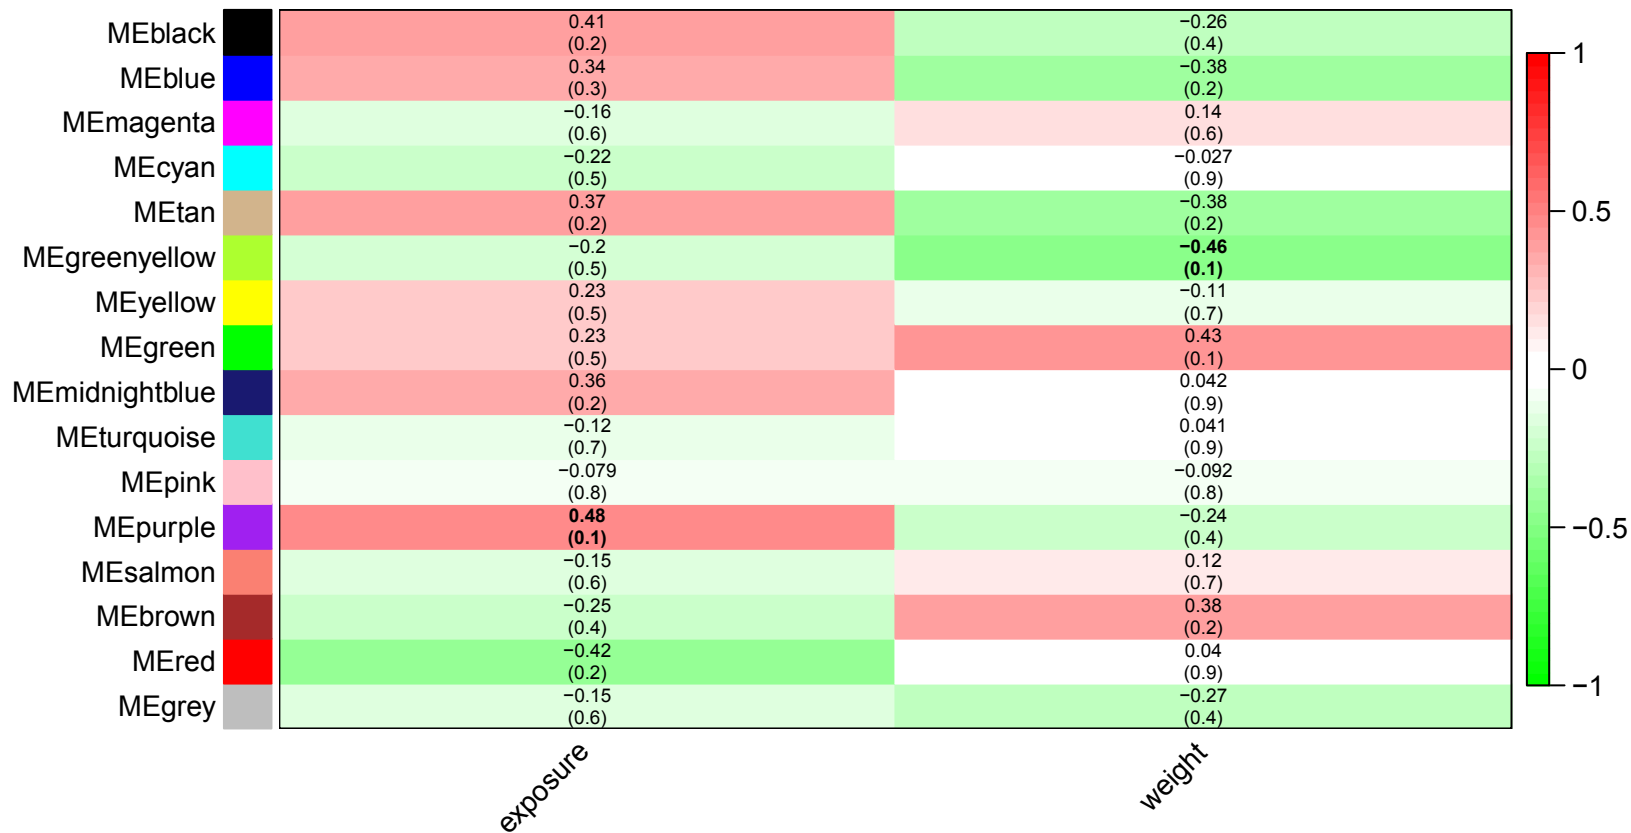

Supplementry Figure 5

Supplement: NIHMS1768749-supplement-SupplementaryFigure5.pdf [file NIHMS1768749-supplement-SupplementaryFigure5.pdf]

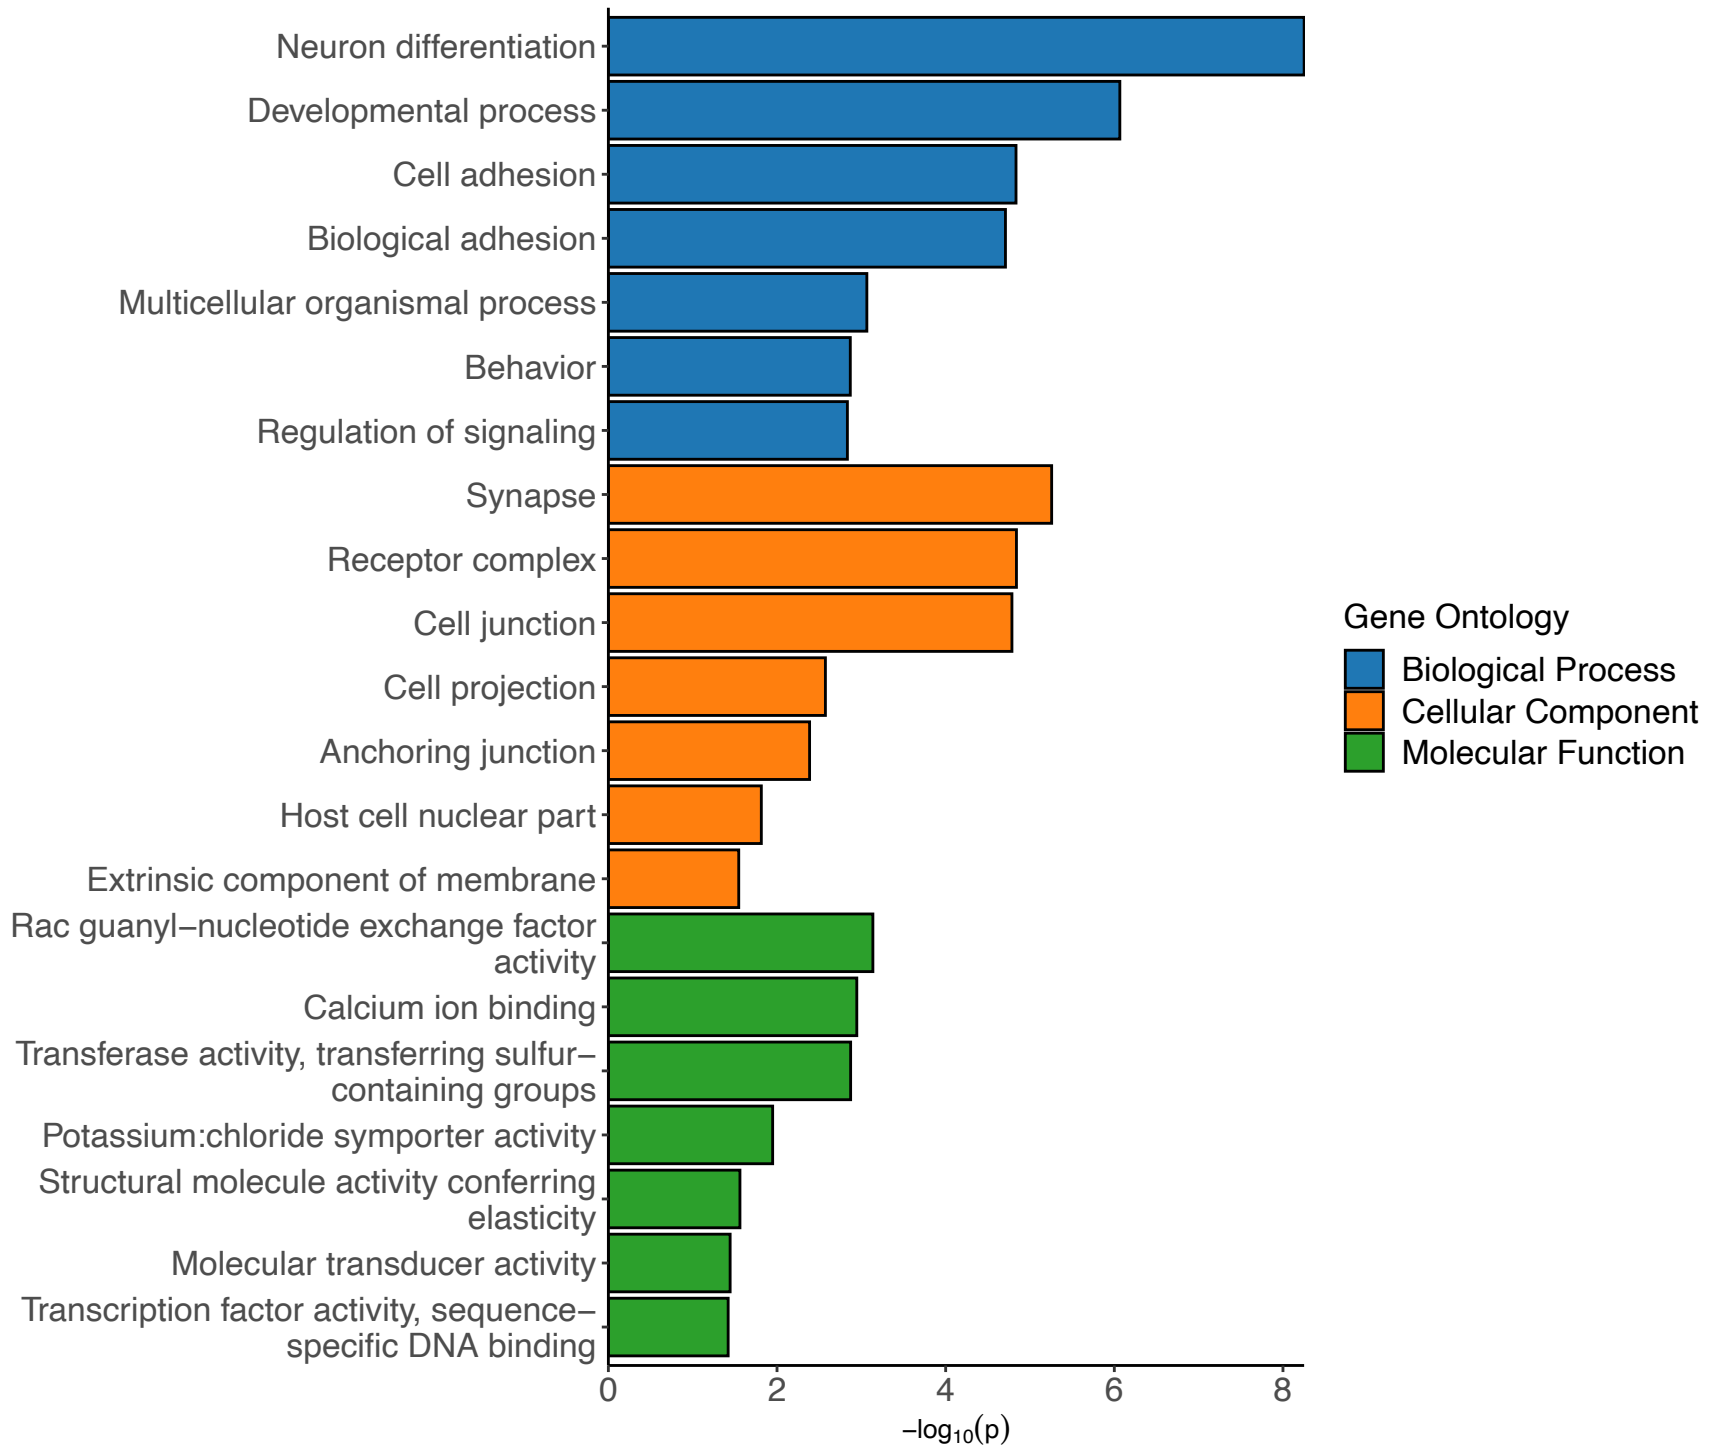

Supplementry Figure 6

Supplement: NIHMS1768749-supplement-SupplementaryFigure6.pdf [file NIHMS1768749-supplement-SupplementaryFigure6.pdf]
